# Supplementary material
Source: Elsevier journal article supplement (https://www.sciencedirect.com/science/article/pii/S0033833814001726)

Figura 1 online.- Estenosis biliares distales. A: imágenes de colangio-RM 2D y STIR transversal de hígado que muestran estenosis regular y progresiva de vía biliar distal (flecha) y edema en páncreas (asterisco) por colangitis relacionada con pancreatitis autoinmune. B: Imágenes de colangio –RM coronales y RM eco de gradiente con supresión grasa con contraste que muestran estenosis corta y abrupta del conducto hepático común, de bordes lisos y regulares por grapa quirúrgica (flechas). C: varón de 82 años con tumor periampular con crecimiento expansivo y componente intraductal (adenocarcinoma mucinoso de páncreas). Imágenes de ecografía, TC y colangio- RM que muestran masa intraductal (asterisco) que se extiende desde cabeza de páncreas y estenosa la vía biliar de forma irregular (flecha).


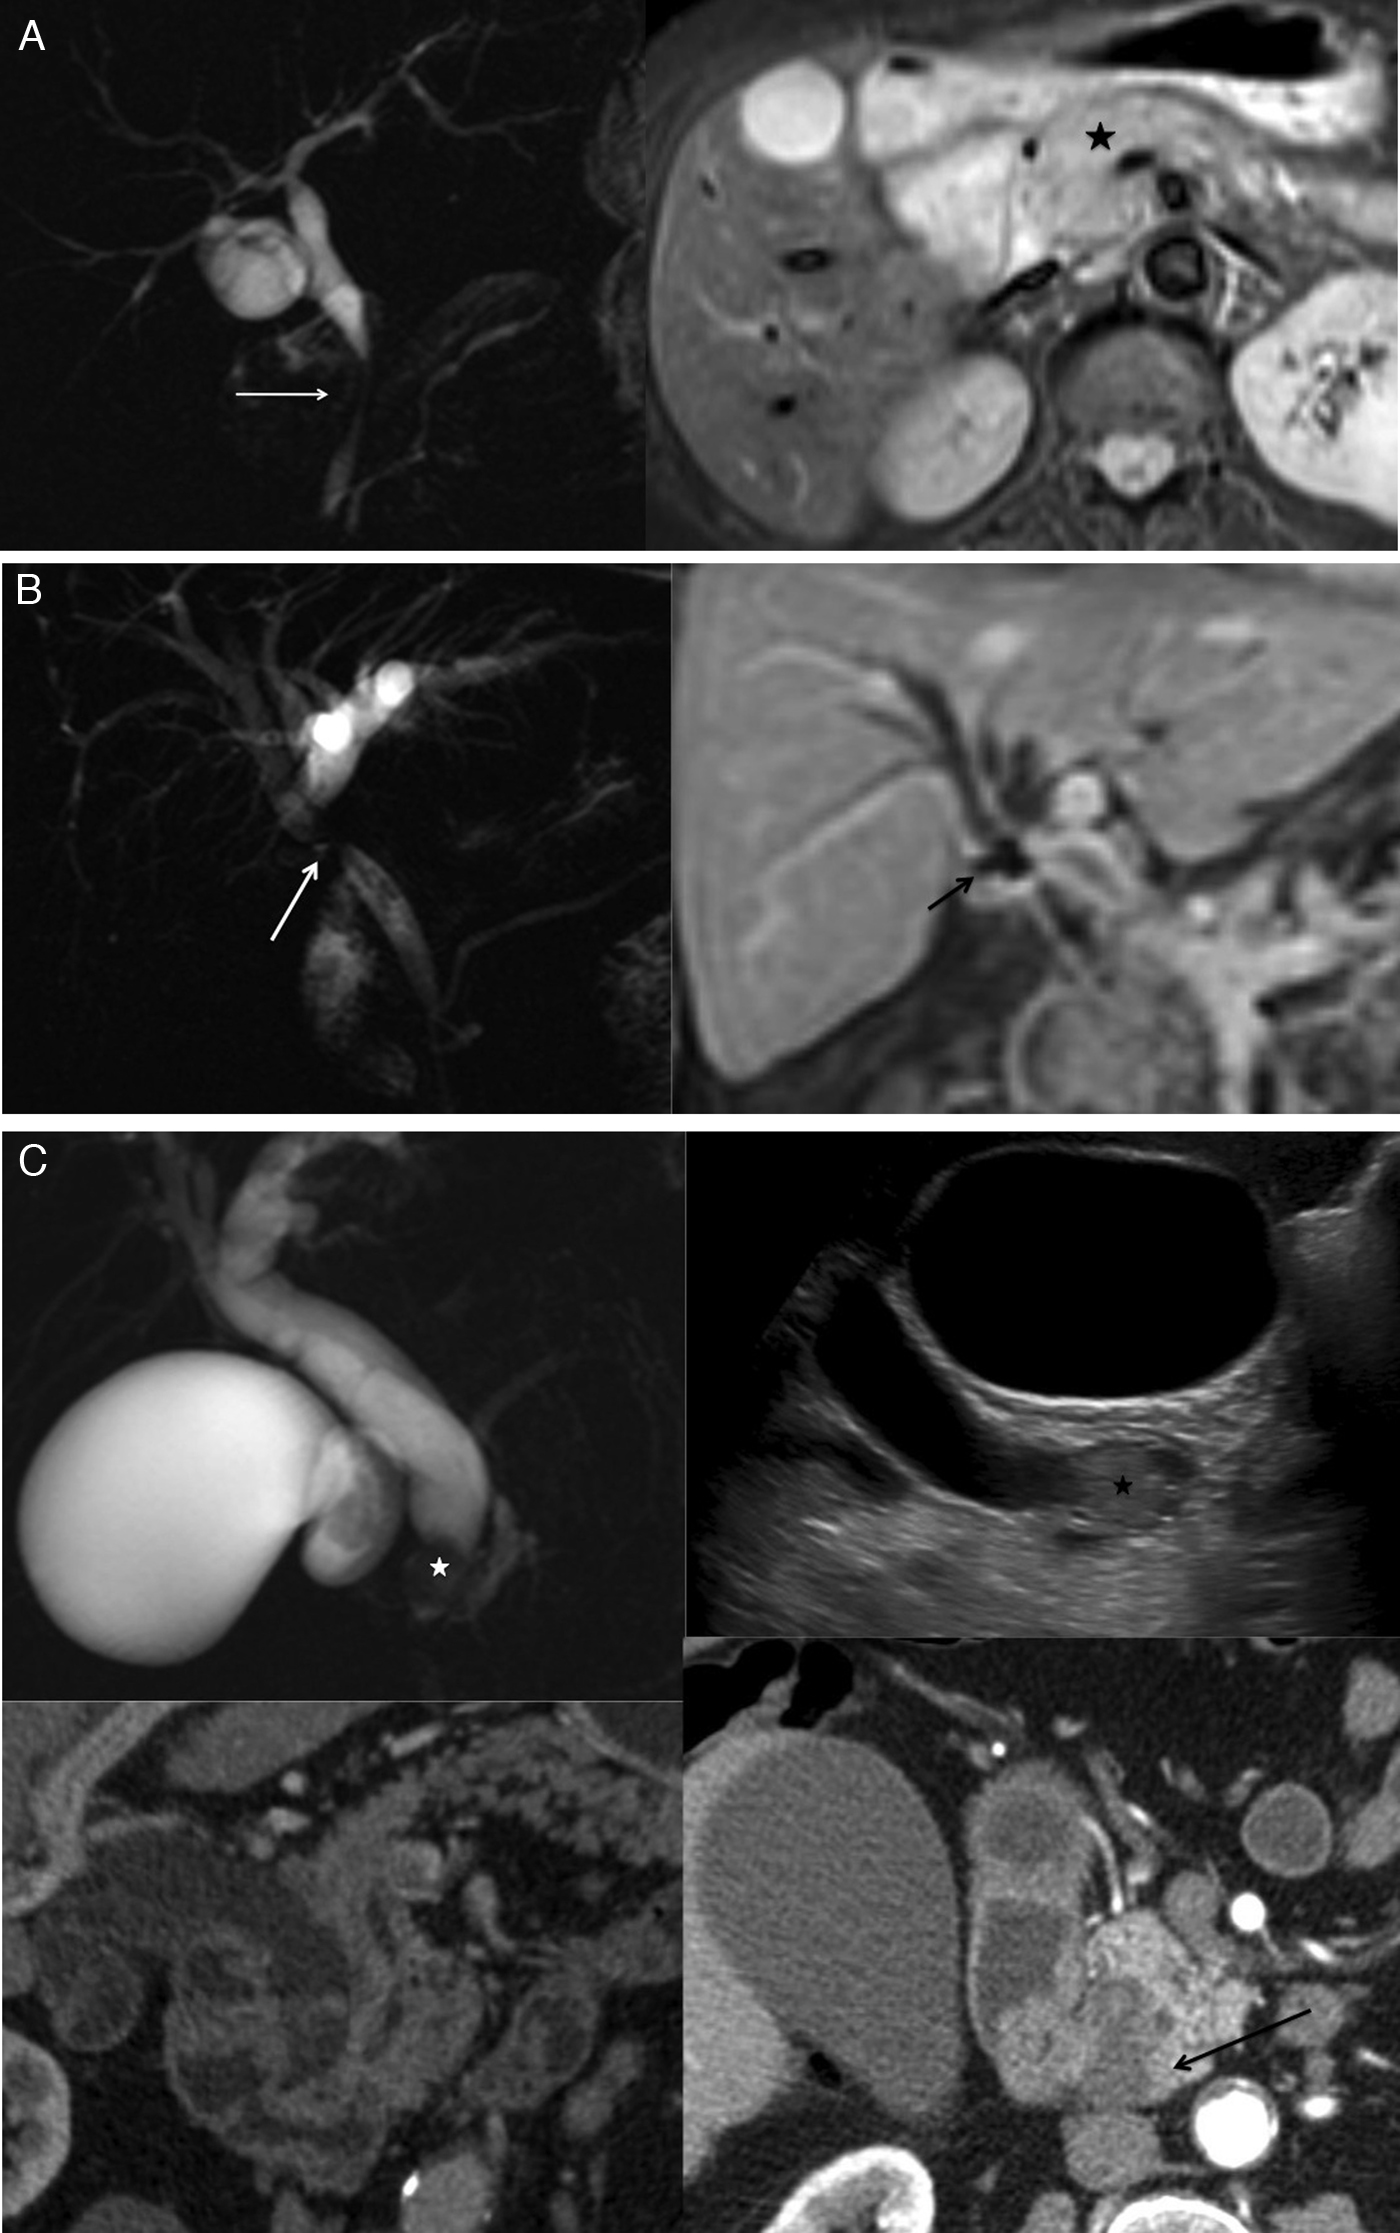

Supplement: mmc1 [file S0033833814001726:mmc1.doc]
